# Supplementary material for: Calixarene-functionalized graphene oxide composites for adsorption of neodymium ions from the aqueous phase
Source: Royal Society of Chemistry journal article supplement (doi:10.1039/c5ra27509a), 2016-01-01
Supplement: c5ra27509a1.pdf [file c5ra27509a1.pdf]

The NMR spectra of the synthesized calixarenes(C4, C6, and C8) have already been prepared and analyzed in the following figures .

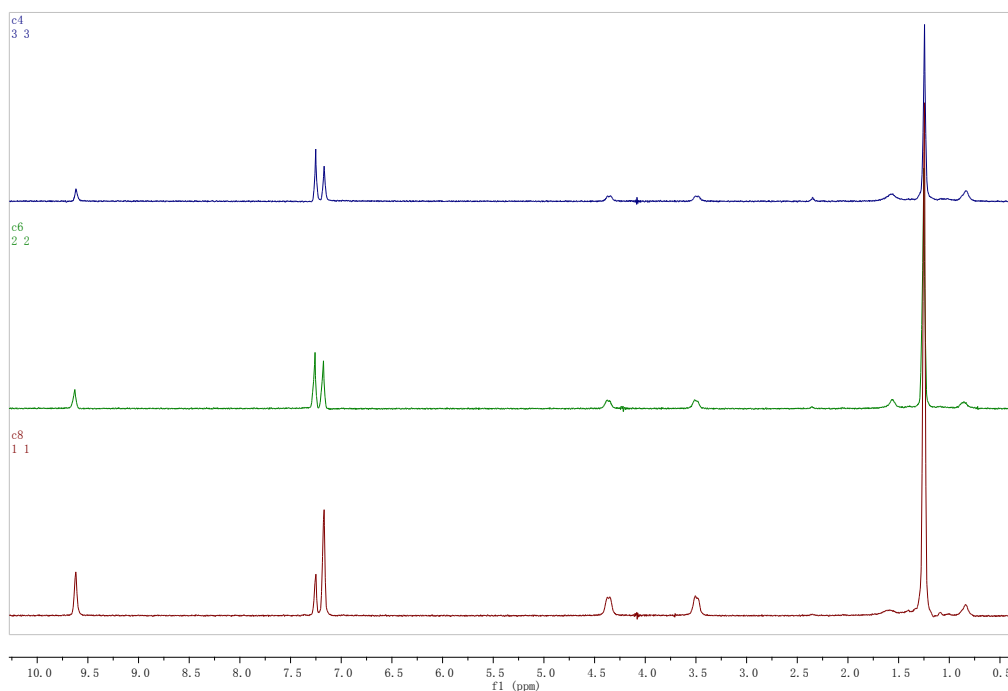

| calixarenes | <sup>1</sup> H NMR (400MHz, CDCl <sub>3</sub> )                                                                                                                                                                                                           |
|-------------|-----------------------------------------------------------------------------------------------------------------------------------------------------------------------------------------------------------------------------------------------------------|
| <b>C4</b>   | $\delta$ =9.616 (s, 4H, Ar-O*H) , 7.169 (s, 8H, Ar-*H) , 4.417-4.290 (d, <sup>2</sup> J=12.00, 4H, Ar-C*H <sub>2</sub> -Ar) , 3.394-3.550 (d, <sup>2</sup> J=12.00, 4H, Ar-C*H <sub>2</sub> -Ar) , 1.244 (s, 36H, C-(C*H <sub>3</sub> ) <sub>3</sub> ) 。  |
| <b>C6</b>   | $\delta$ =9.629 (s, 6H, Ar-O*H) , 7.176 (s, 12H, Ar-*H) , 4.292-4.452 (d, <sup>2</sup> J=12.00, 6H, Ar-C*H <sub>2</sub> -Ar) , 3.419-3.606 (d, <sup>2</sup> J=12.00, 6H, Ar-C*H <sub>2</sub> -Ar) , 1.250 (s, 54H, C-(C*H <sub>3</sub> ) <sub>3</sub> ) 。 |
| <b>C8</b>   | $\delta$ =9.620 (s, 8H, Ar-O*H) , 7.169 (s, 16H, Ar-*H) , 4.262-4.450 (d, <sup>2</sup> J=12.00, 8H, Ar-C*H <sub>2</sub> -Ar) , 3.360-3.609 (d, <sup>2</sup> J=12.00, 8H, Ar-C*H <sub>2</sub> -Ar) , 1.245 (s, 72H, C-(C*H <sub>3</sub> ) <sub>3</sub> ) 。 |

\*H is the target of hydrogen and the <sup>1</sup>H  $\delta$  value of CDCl<sub>3</sub> is 7.250-7.259(s).
